# Supplementary material for: Capsule Promotes Intracellular Survival and Vascular Endothelial Cell Translocation during Invasive Pneumococcal Disease
Source: PubMed Central journal article supplement (PMC8510516; doi:10.1128/mbio.02516-21), 2021-10-12

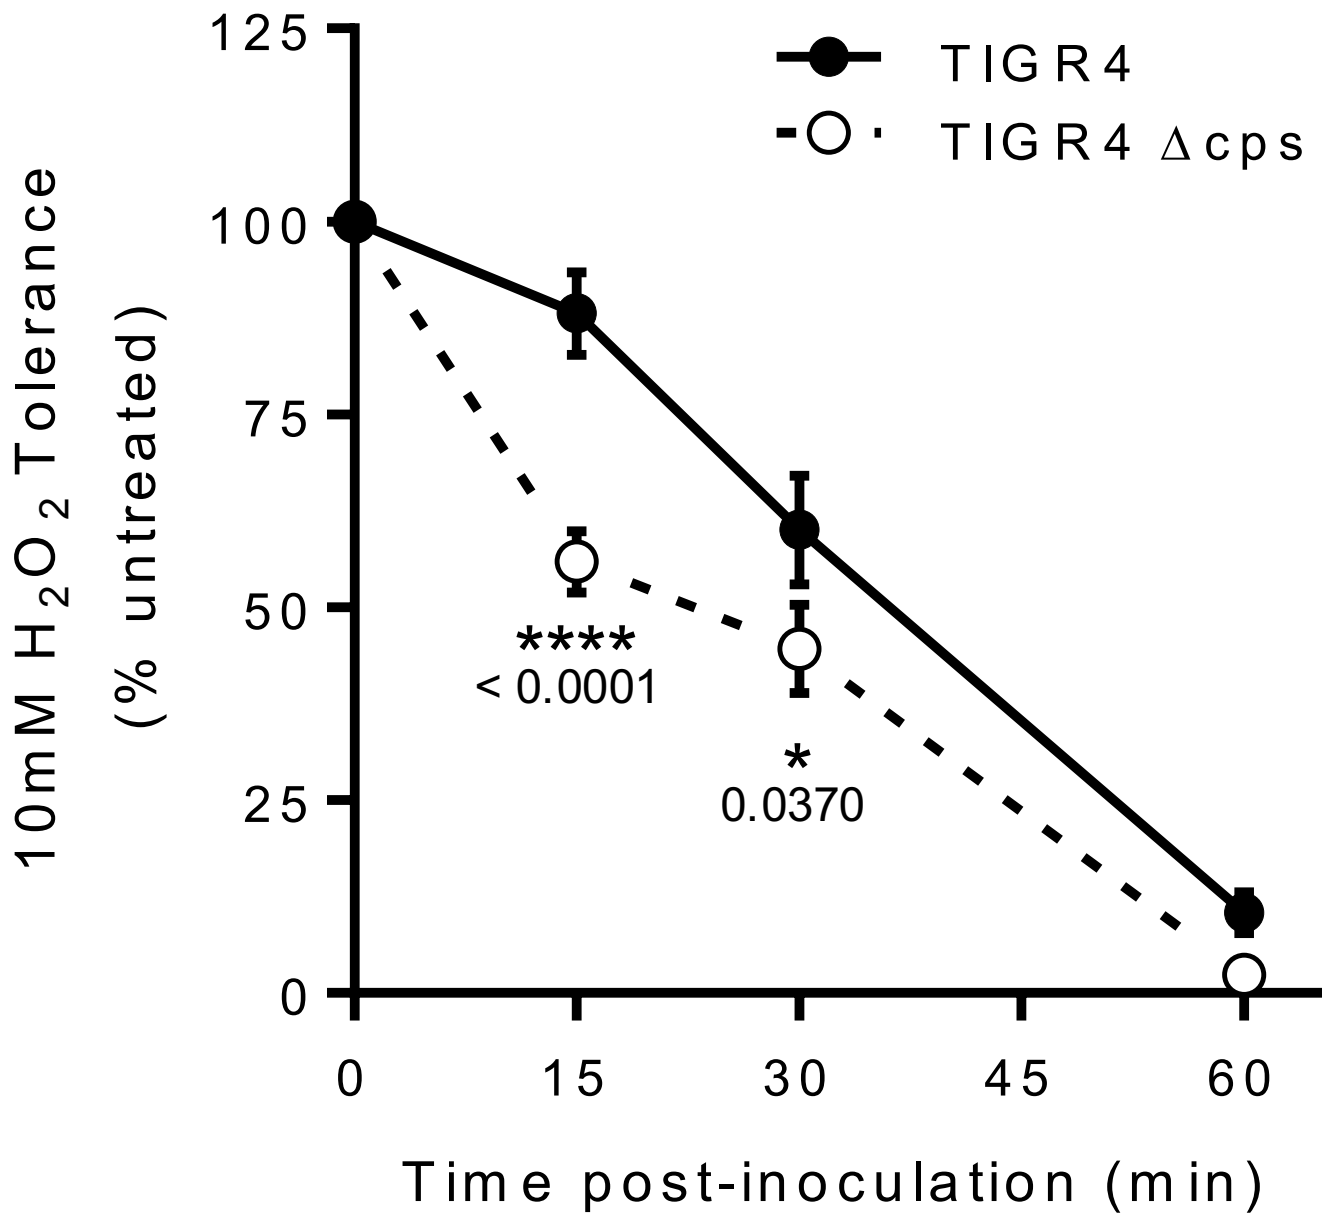

Supplement: mbio.02516-21-sf002.pdf [file mbio.02516-21-sf002.pdf]
