# Supplementary material for: Capsule Promotes Intracellular Survival and Vascular Endothelial Cell Translocation during Invasive Pneumococcal Disease
Source: PubMed Central journal article supplement (PMC8510516; doi:10.1128/mbio.02516-21), 2021-10-12
Supplement: mbio.02516-21-st001.pdf [file mbio.02516-21-st001.pdf]

**Supplemental Table 1. Strains used in this study**

| Code     | Strain Name              | Relevant Genotype                         | Antibiotic resistance <sup>a</sup> | Relevant Features                                                                                           | Ref <sup>b</sup> |
|----------|--------------------------|-------------------------------------------|------------------------------------|-------------------------------------------------------------------------------------------------------------|------------------|
|          | TIGR4                    | WT                                        | N/A                                | <i>Streptococcus pneumoniae</i> serotype 4 Strain TIGR4                                                     | [1]              |
|          | WU2                      | WT                                        | N/A                                | <i>Streptococcus pneumoniae</i> serotype 3 Strain WU2                                                       | [2]              |
|          | D39                      | WT                                        | N/A                                | <i>Streptococcus pneumoniae</i> serotype 2 Strain D39                                                       | [3]              |
| SpnTB4   | $\Delta cps$             | TIGR4 <i>cps::cat</i>                     | Cm                                 | Replacement of the whole <i>cps</i> locus by an Erythromycin resistance cassette                            | [4]              |
| SpNTB25  | $\Delta lytA$            | TIGR4 $\Delta lytA::erm$                  | Ery                                | Replacement of the gene <i>lytA</i> by an Erythromycin resistance cassette                                  | [4]              |
| SpNTB102 | $\Delta lytA \Delta cps$ | TIGR4 <i>cps::cat \Delta lytA::erm</i>    | Cm<br>Ery                          | Replacement of the gene <i>lytA</i> by an Erythromycin resistance cassette in a non-encapsulated background | [4]              |
| SpNTB86  | TIGR4 <sup>ISO4</sup>    |                                           | Sm                                 | TIGR4 expressing serotype 4 capsule                                                                         | [4]              |
| SpNTB88  | TIGR4 <sup>ISO2</sup>    |                                           | Sm                                 | TIGR4 expressing serotype 2 capsule                                                                         | [4]              |
| SpNEM42  | TIGR4 <sup>ISO5</sup>    |                                           | Sm                                 | TIGR4 expressing serotype 5 capsule                                                                         | [4]              |
| SpNTB45  | TIGR4 <sup>ISO6A</sup>   |                                           | Sm                                 | TIGR4 expressing serotype 6A capsule                                                                        | [4]              |
| SpNTB59  | TIGR4 <sup>ISO7A</sup>   |                                           | Sm                                 | TIGR4 expressing serotype 7A capsule                                                                        | [4]              |
| SpNEM12  | TIGR4 <sup>ISO11A</sup>  |                                           | Sm                                 | TIGR4 expressing serotype 11A capsule                                                                       | [4]              |
| SpNEM13  | TIGR4 <sup>ISO19F</sup>  |                                           | Sm                                 | TIGR4 expressing serotype 19F capsule                                                                       | [4]              |
| SpNEM14  | TIGR4 <sup>ISO19A</sup>  |                                           | Sm                                 | TIGR4 expressing serotype 19A capsule                                                                       | [4]              |
| SpnTB62  | TIGR4 <sup>ISO23F</sup>  |                                           | Sm                                 | TIGR4 expressing serotype 23F capsule                                                                       | [4]              |
| SpNTB97  | WU2 <sup>ISO4</sup>      |                                           | Sm                                 | WU2 expressing serotype 4 capsule                                                                           | [4]              |
| SpNTB112 | WU2 <sup>ISO2</sup>      |                                           | Sm                                 | WU2 expressing serotype 2 capsule                                                                           | [4]              |
|          | BLS101                   |                                           | N/A                                | TIGR4 expressing 33A capsule                                                                                | [5]              |
|          | BLS140                   | $\Delta wciJ::aad9$<br>$wcJE::nptII-rpsL$ | Kn<br>Spc                          | TIGR4 expressing non O-Acetylated 33 capsule                                                                | [5]              |
|          | TIGRJS                   |                                           | Kn<br>Sm                           | Non encapsulated TIGR4 containing janus cassette                                                            | [5]              |
| 1        | MNK1178                  |                                           | N/A                                | Serotype 1 Clinical isolate                                                                                 | [4]              |
| 2        | MNK0300                  |                                           | N/A                                | Serotype 5 Clinical isolate                                                                                 | [4]              |
| 3        | MNK0009                  |                                           | N/A                                | Serotype 6B Clinical isolate                                                                                | [4]              |
| 4        | MNK0759                  |                                           | N/A                                | Serotype 7F Clinical isolate                                                                                | [4]              |
| 6        | MNK0418                  |                                           | N/A                                | Serotype 11A Clinical isolate                                                                               | [4]              |
| 7        | MNK0057                  |                                           | N/A                                | Serotype 15B Clinical isolate                                                                               | [4]              |
| 10       | MNK0361                  |                                           | N/A                                | Serotype 19F Clinical isolate                                                                               | [4]              |
| 11       | MNK0420                  |                                           | N/A                                | Serotype 23F Clinical isolate                                                                               | [4]              |
|          | 5448                     |                                           |                                    | Group A <i>Streptococcus</i> MIT1 clinical isolate 5448                                                     | [6]              |

|           |     |                                                    |     |
|-----------|-----|----------------------------------------------------|-----|
| 5884ΔhasA | Ery | Capsule deficient mutant of 5448                   | [6] |
| Reynolds  |     | <i>Staphylococcus aureus</i> Reynolds CP5 positive | [7] |
| JLO22     |     | <i>Staphylococcus aureus</i> Reynolds CP5 negative | [7] |

<sup>a</sup> Cm: Chloramphenicol (4.5μg/mL), Sm Streptomycin (300μg/ml), Kn: Kanamycin (200μg/mL), Ery: Erythromycin (0.5μg/ml, 5μg/ml for GAS)

<sup>b</sup> [1] <sup>(1)</sup>, [2] <sup>(2)</sup>, [3] <sup>(3)</sup>, [4] this study, [5] <sup>(4)</sup>, [6] <sup>(5)</sup> [7] <sup>(6)</sup>

1. C. K. Stover *et al.*, Complete genome sequence of *Pseudomonas aeruginosa* PAO1, an opportunistic pathogen. *Nature* **406**, 959-964 (2000).
2. D. E. Briles *et al.*, Antiphosphocholine antibodies found in normal mouse serum are protective against intravenous infection with type 3 streptococcus pneumoniae. *J Exp Med* **153**, 694-705 (1981).
3. J. A. Lanie *et al.*, Genome sequence of Avery's virulent serotype 2 strain D39 of *Streptococcus pneumoniae* and comparison with that of unencapsulated laboratory strain R6. *J Bacteriol* **189**, 38-51 (2007).
4. B. L. Spencer, J. S. Saad, A. T. Shenoy, C. J. Orihuela, M. H. Nahm, Position of O-Acetylation within the Capsular Repeat Unit Impacts the Biological Properties of Pneumococcal Serotypes 33A and 33F. *Infect Immun* **85** (2017).
5. A. Hollands *et al.*, Genetic switch to hypervirulence reduces colonization phenotypes of the globally disseminated group A streptococcus M1T1 clone. *J Infect Dis* **202**, 11-19 (2010).
6. M. Portoles, K. B. Kiser, N. Bhasin, K. H. Chan, J. C. Lee, *Staphylococcus aureus* Cap5O has UDP-ManNAc dehydrogenase activity and is essential for capsule expression. *Infect Immun* **69**, 917-923 (2001).
