# Supplementary material for: Capsule Promotes Intracellular Survival and Vascular Endothelial Cell Translocation during Invasive Pneumococcal Disease
Source: PubMed Central journal article supplement (PMC8510516; doi:10.1128/mbio.02516-21), 2021-10-12
Supplement: mbio.02516-21-st002.pdf [file mbio.02516-21-st002.pdf]

**Supplemental Table 2. Primers used in this study**

| Name                                                                                                 | 5' → 3' sequences                                                                                                                                                             | Description                         | Reference |
|------------------------------------------------------------------------------------------------------|-------------------------------------------------------------------------------------------------------------------------------------------------------------------------------|-------------------------------------|-----------|
| lytA_UP-FW<br>lytA_UP (Spl_EryK7)-RV<br>lytA_DN (Spl_EryK7)-FW<br>lytA_DN-RV                         | AGCCTCTTGTTGATTTATCG<br>TCTAAGTCTTATTCCCGGGCATATTCTACTCCTTATC<br>TCTAAATTTGGAAGCCGTTGATTACAGTAAAATAATAATG<br>TTTCTCTGATTTCTCAACC                                              | Construction of TIGR4 $\Delta$ lytA | [1]       |
| CmK7-FW<br>CmK7-RV                                                                                   | GTATGTCAAAAAGACCC<br>GCGGCCGCTTATAAAAAGCC                                                                                                                                     | Cassette amplification              | [1]       |
| EryK7-FW<br>Ery-K7-RV                                                                                | CCCGGGAATAAGACTTAGA<br>CGGCTTCCAAATTTACA                                                                                                                                      | Cassette amplification              | [1]       |
| cps4A_UP-FW<br>cps4A_UP (Spl_CmK7)-RV<br>Full_CAPS4_Locus_DN (Spl_CmK7)-FW<br>Full_CAPS4_Locus_DN-RV | ATCTAAACAGGTGCTAGG<br>GGTCTTTTGACATAACCATGATTAATACCTATAC<br>GCTTTTATAAGCGGCCGCGTTTGGAGGAAAAGCTGAA<br>TTGTATA<br>TGGGACGGAGTAAAAGAGTCC                                         | Construction of TIGR4 $\Delta$ cps  | [1]       |
| licA_UP-FW<br>licA_UP (Spl_SpcK7)-RV<br>licA_DN (Spl_SpcK7)-FW<br>licA_DN-RV                         | TTGACTCTTGCTCATAGC<br>TCCTCCTCACTATTTTGCACAATTAACCTCCAGT<br>TGGAACACTTCGTGAATGGAGGTTTCAGATGAAAAGTA<br>ATTAACCTGAACCAAGGC                                                      | Construction of TIGR4 $\Delta$ licA | [1]       |
| rpsL-FW<br>rpsL-RV                                                                                   | GTG CTG ACA AAT GTT GC<br>TTC TCT TTA TCC CCT TTC C                                                                                                                           | Cassette amplification              | [1]       |
| Janus-FW<br>Janus-RV                                                                                 | GGG AGG ACT GTA TAA AA<br>GAA CCC GAT AAA ACT GA                                                                                                                              | Cassette amplification              | [1]       |
| dexB-FW<br>dexB -(Spl_Janus)-RV<br>aliA (Spl_Janus)-FW<br>aliA-RV                                    | AAG TTA GGA AAC TAC GG<br>AGT CCT CCC GTT CAT CTT CTT TCT CC<br>ATC GGG TTC GGA ACA ATA GGT TGT GG<br>GAT TCA GCA TTC AAG GG                                                  | Construction of Spn <sub>SK7</sub>  | [1]       |
| 2f<br>2r                                                                                             | TATCCCAGTTCAATATTTCTCCACTACACC<br>ACACAAAATATAGGCAGAGAGAGACTACT                                                                                                               |                                     | [2]       |
| 3f<br>3r                                                                                             | ATGGTGTGATTTCTCCTAGATTGGAAAGTAG<br>CTTCTCCAATTGCTTACCAAGTGCAATAACG                                                                                                            | Serotyping                          | [2]       |
| 4f<br>4r                                                                                             | CTGTTACTTGTTCTGGACTCTCGATAATTGG<br>GCCCACTCCTGTAAAATCCTACCCGCATTG                                                                                                             |                                     | [3]       |
| Pcat-FW<br>Pcat-RV                                                                                   | ATTTGTTTGATTTTTAATGGATAATGTGATATAATGGTTCAA<br>TGTTCAATGTATAGGTATTAATCATGAGTAGACGT<br>TGAACCATTATATCACATTATCCATTA AAAATCAAACAAATT<br>ATTTTACTATCTGCATCTTTAAGTATCTTAGTAGACTTCCC | Construction of Pcat-cps            | [1]       |

<sup>a</sup> [1] This study, [2] <sup>(1)</sup>, [3] <sup>(2)</sup>

1. M. da Gloria Carvalho *et al.*, Revisiting pneumococcal carriage by use of broth enrichment and PCR techniques for enhanced detection of carriage and serotypes. *J Clin Microbiol* **48**, 1611-1618 (2010).
2. R. Pai, R. E. Gertz, B. Beall, Sequential multiplex PCR approach for determining capsular serotypes of *Streptococcus pneumoniae* isolates. *J Clin Microbiol* **44**, 124-131 (2006).
